# Supplementary material
Source: PubMed Central journal article supplement (PMC2830652)
Supplement: NIHMS178497-supplement-1.pdf [file NIHMS178497-supplement-1.pdf]

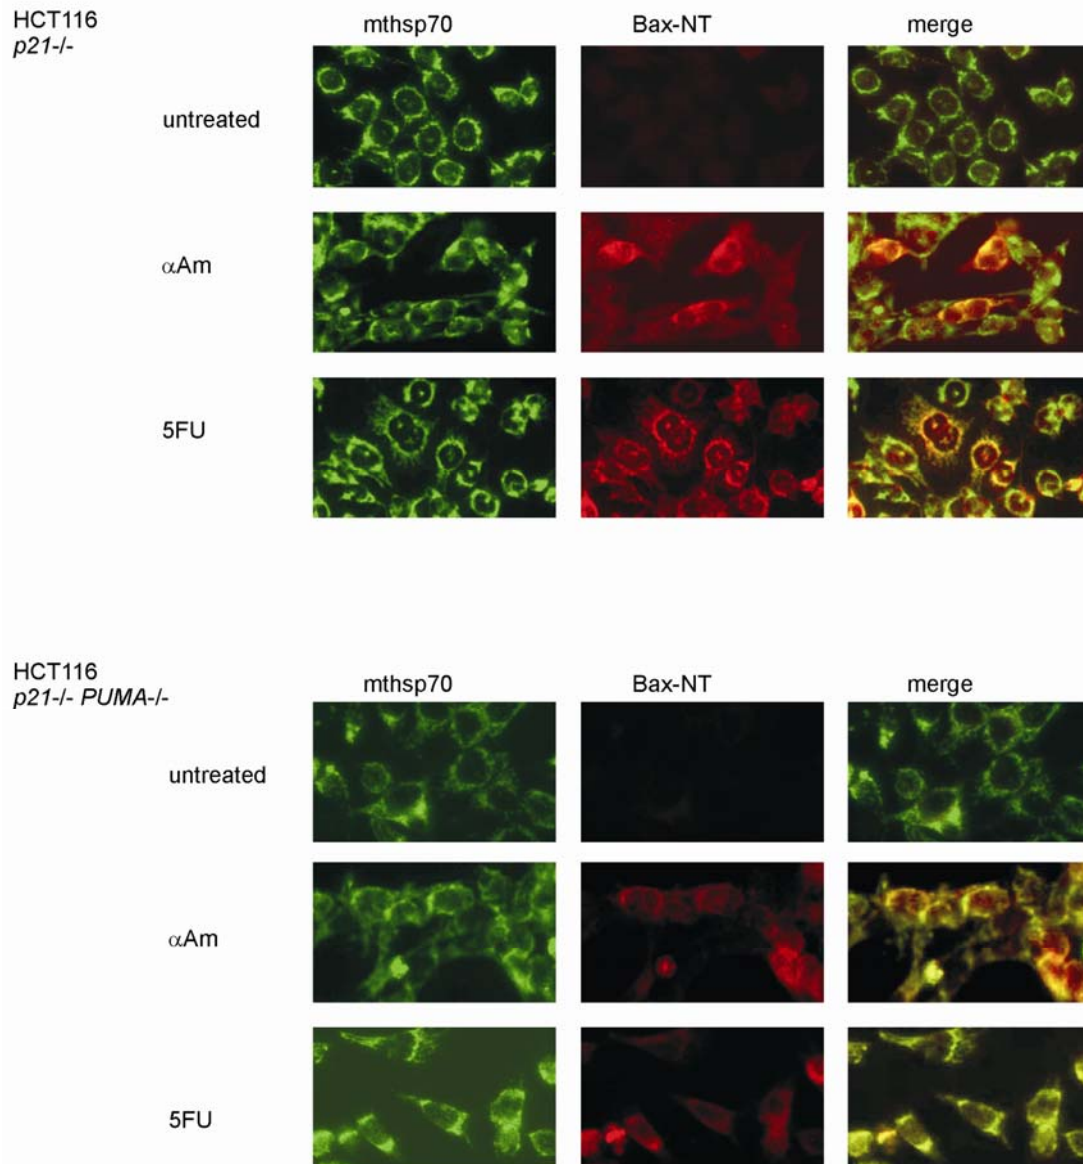

**Supplementary information, Figure S1** Death stimulus-induced mitochondrial translocation of Bax is independent of Puma. Blockade of the transcriptional arm of the p53 response with  $\alpha$ -amanitin ( $\alpha$ Am) does not interfere with Bax translocation to the outer mitochondrial membrane. Moreover, Puma is dispensable for this event. HCT116 *p21*<sup>-/-</sup> *PUMA*<sup>-/-</sup> cells were treated as indicated in Figure 1D and immunostained with antibodies against mtsp70 (green) and N-terminal specific Bax (red). The merged images show co-localization of mtsp70 and Bax in yellow.
